# Supplementary material for: Cariprazine Treatment of Bipolar Depression: A Randomized Double-Blind Placebo-Controlled Phase 3 Study
Source: Atypon-hosted journal article supplement (doi:10.1176/appi.ajp.2018.18070824), 2019-03-08
Supplement: appi.ajp.2018.18070824.ds001.pdf [file appi.ajp.2018.18070824.ds001.pdf]

**TABLE S1.** Incidence of extrapyramidal symptoms-related TEAEs by treatment group and preferred term, double-blind treatment period (safety population)

| Preferred Term                      | Placebo<br>(n=158)<br>n (%) | Cariprazine 1.5 mg/d<br>(n=157)<br>n (%) | Cariprazine 3.0 mg/d<br>(n=165)<br>n (%) |
|-------------------------------------|-----------------------------|------------------------------------------|------------------------------------------|
| Patients with at least one EPS TEAE | 13 (8.2)                    | 17 (10.8)                                | 26 (15.8)                                |
| Restlessness                        | 6 (3.8)                     | 2 (1.3)                                  | 12 (7.3)                                 |
| Akathisia                           | 5 (3.2)                     | 10 (6.4)                                 | 9 (5.5)                                  |
| Musculoskeletal stiffness           | 0                           | 0                                        | 2 (1.2)                                  |
| Salivary hypersecretion             | 1 (0.6)                     | 4 (2.5)                                  | 1 (0.6)                                  |
| Tremor                              | 2 (1.3)                     | 1 (0.6)                                  | 1 (0.6)                                  |
| Muscle tightness                    | 0                           | 1 (0.6)                                  | 1 (0.6)                                  |
| Extrapyramidal disorder             | 1 (0.6)                     | 0                                        | 1 (0.6)                                  |
| Tardive dyskinesia                  | 0                           | 0                                        | 1 (0.6)                                  |
| Drooling                            | 0                           | 1 (0.6)                                  | 0                                        |
| Oculogyric crisis                   | 1 (0.6)                     | 0                                        | 0                                        |

n=number of patients with EPS TEAEs

Patients are counted only once within each preferred term.

AEs that occurred more than 30 days after the last dose of double-blind investigational product are not included in the summary.

**TABLE S2.** Changes from baseline in clinical laboratory values

| Parameter                                                 | Placebo           |       |       | Cariprazine       |        |       |                   |        |       |
|-----------------------------------------------------------|-------------------|-------|-------|-------------------|--------|-------|-------------------|--------|-------|
|                                                           |                   |       |       | 1.5 mg/d          |        |       | 3.0 mg/d          |        |       |
|                                                           | N                 | Mean  | SD    | N                 | Mean   | SD    | N                 | Mean   | SD    |
| <b>Liver Function</b>                                     |                   |       |       |                   |        |       |                   |        |       |
| Alanine aminotransferase, U/L                             | 149               | 0.5   | 10.1  | 148               | 0.1    | 7.3   | 152               | 2.5    | 15.9  |
| Aspartate aminotransferase, U/L                           | 149               | 0.4   | 10.5  | 148               | -0.4   | 6.4   | 152               | 0.6    | 8.5   |
| Total bilirubin, mg/dL                                    | 148               | 0.023 | 0.196 | 148               | -0.021 | 0.281 | 152               | -0.011 | 0.191 |
| <b>Metabolic Parameters</b>                               |                   |       |       |                   |        |       |                   |        |       |
| HDL cholesterol, mg/dL                                    | 149               | 1.28  | 9.84  | 148               | -0.46  | 11.08 | 152               | -1.30  | 8.53  |
| LDL cholesterol, mg/dL <sup>a</sup>                       | 149               | -4.17 | 21.10 | 148               | -5.95  | 23.50 | 152               | -6.72  | 24.49 |
| Total cholesterol, mg/dL                                  | 149               | -3.46 | 26.24 | 148               | -4.46  | 26.68 | 152               | -6.90  | 26.93 |
| Triglycerides, mg/dL                                      | 132               | -3.22 | 52.46 | 125               | 9.86   | 57.16 | 129               | 4.81   | 54.69 |
| Fasting glucose, mg/dL                                    | 132               | 3.35  | 11.90 | 126               | 5.04   | 23.73 | 127               | 2.69   | 12.44 |
| <b>Chemistry Parameters</b>                               |                   |       |       |                   |        |       |                   |        |       |
| Prolactin, ng/mL                                          | 137               | -1.11 | 13.75 | 136               | -1.23  | 26.97 | 136               | 2.14   | 12.50 |
| Creatine kinase, U/L                                      | 149               | 13.2  | 88.9  | 148               | 14.1   | 130.5 | 152               | 20.6   | 92.0  |
| <b>Vital Signs</b>                                        |                   |       |       |                   |        |       |                   |        |       |
| Systolic blood pressure, mmHg <sup>b</sup>                | 158               | -0.3  | 9.8   | 157               | -0.2   | 10.8  | 165               | -0.5   | 10.9  |
| Diastolic blood pressure, mmHg <sup>b</sup>               | 158               | 0.2   | 8.1   | 157               | -0.6   | 7.9   | 165               | -0.5   | 7.0   |
| Pulse rate, bpm <sup>b</sup>                              | 158               | -0.50 | 9.2   | 157               | -1.0   | 10.6  | 165               | 1.8    | 9.0   |
| Body weight, kg                                           | 158               | -0.27 | 2.31  | 157               | 0.48   | 1.85  | 165               | 0.45   | 2.20  |
| Waist circumference, cm                                   | 156               | -0.73 | 3.84  | 151               | -0.08  | 3.52  | 161               | 0.41   | 3.34  |
| <b>Other Safety Outcomes</b>                              |                   |       |       |                   |        |       |                   |        |       |
|                                                           | n/N1 <sup>c</sup> |       | %     | n/N1 <sup>c</sup> |        | %     | n/N1 <sup>c</sup> |        | %     |
| Orthostatic hypotension <sup>d</sup>                      | 16/158            |       | 10.1  | 13/156            |        | 8.3   | 17/164            |        | 10.4  |
| Treatment-emergent parkinsonism (SAS rating) <sup>e</sup> | 1/158             |       | 0.6   | 0/157             |        | 0     | 7/165             |        | 4.2   |
| Treatment-emergent akathisia (BARS rating) <sup>f</sup>   | 7/158             |       | 4.4   | 14/157            |        | 8.9   | 21/165            |        | 12.7  |
| Treatment-emergent mania (YMRS rating) <sup>g</sup>       | 2/157             |       | 1.3   | 1/153             |        | 0.7   | 0/164             |        | 0     |

HDL=high-density lipoprotein; LDL=low-density lipoprotein; BARS=Barnes Akathisia Rating Scale; SAS=Simpson-Angus Scale; YMRS=Young Mania Rating Scale.

<sup>a</sup>LDL direct and LDL calculated are combined; <sup>b</sup>value recorded in supine position; <sup>c</sup>n/N1=number of patients who met criteria during double-blind treatment / total number of patients with ≥1 postbaseline assessment of interest; <sup>d</sup>≥20 mmHg reduction in systolic blood pressure or ≥10 mmHg reduction in diastolic blood pressure after changing from supine to standing position; <sup>e</sup>SAS ≤3 at baseline and >3 postbaseline; <sup>f</sup>BARS ≤2 at baseline and >2 postbaseline; <sup>g</sup>YMRS total score ≥16 or greater at any visit.

**FIGURE S1.** CONSORT flow diagram for study participants

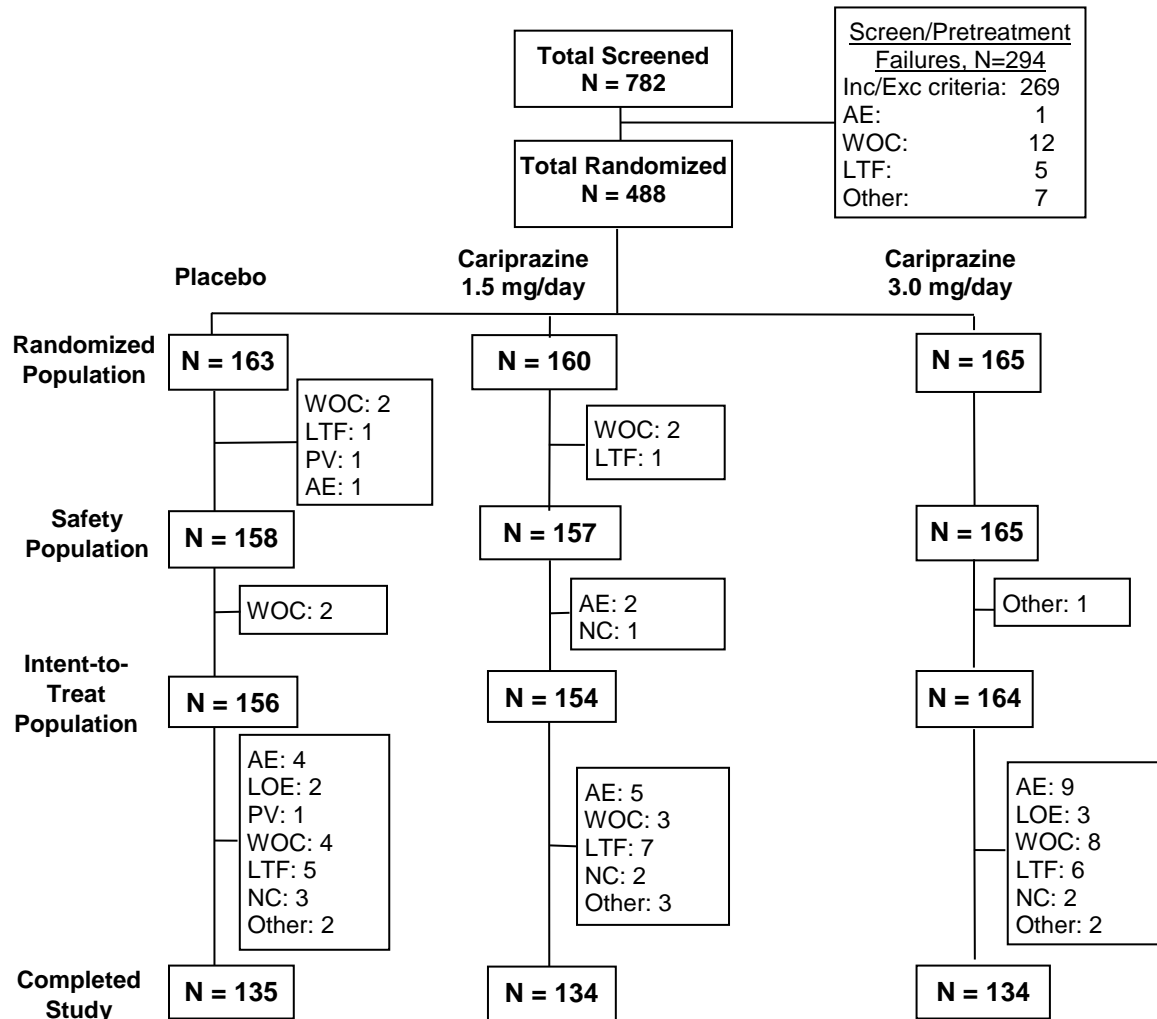

AE=adverse event; Inc/Exc criteria= patient did not meet inclusion/exclusion criteria; LTF=lost to follow-up; LOE=lack of efficacy; NC=noncompliance with study drug; PV=protocol violation; WOC=withdrawal of consent.
